# Supplementary material for: How to Improve the Management of Acute Ischemic Stroke by Modern Technologies, Artificial Intelligence, and New Treatment Methods
Source: MDPI journal article supplement (doi:10.3390/life11060488), 2021-05-27
Supplement: s1 [file s1]

**Table S1.** Role of new technologies and artificial intelligence in acute stroke patient management.

| Time period                                                     | Process | New Technology                            | Tool Example                              | Impact / Sensitivity of Technology Application                                                                                                                                                        | References |
|-----------------------------------------------------------------|---------|-------------------------------------------|-------------------------------------------|-------------------------------------------------------------------------------------------------------------------------------------------------------------------------------------------------------|------------|
| Prehospital                                                     |         |                                           |                                           |                                                                                                                                                                                                       |            |
| Stroke symptoms recognition and first aid call                  |         |                                           |                                           |                                                                                                                                                                                                       |            |
|                                                                 |         | Facial asymmetry detection                |                                           | Current accuracies up to 87%                                                                                                                                                                          | [22]       |
| After first aid arrival                                         |         |                                           |                                           |                                                                                                                                                                                                       |            |
|                                                                 |         | Standardization of clinical examination   | FAST-ED                                   | Improved diagnostic process                                                                                                                                                                           | [24]       |
|                                                                 |         | Automated scoring of patient facial palsy | eFACE                                     | Interclass correlation for eFACE scores: 0.96                                                                                                                                                         | [25]       |
|                                                                 |         | Decision making algorithms system         |                                           | Increased documentation quality from 78.66% to 100%                                                                                                                                                   | [26]       |
|                                                                 |         | Mobile CT                                 |                                           | Faster diagnosis                                                                                                                                                                                      | [27]       |
| Team activation, consultation, and transfer                     |         |                                           |                                           |                                                                                                                                                                                                       |            |
|                                                                 |         | Telemedicine / teleradiology              |                                           | Improved decision                                                                                                                                                                                     | [28–30]    |
|                                                                 |         | Real-time traffic information             |                                           | Faster patient transport                                                                                                                                                                              | [31]       |
|                                                                 |         | GPS location of the ambulance             | STEMI application                         | Better stroke-team management                                                                                                                                                                         | [32]       |
| Prenotification – stroke team activation before patient arrival |         |                                           |                                           |                                                                                                                                                                                                       |            |
|                                                                 |         | Workflow application                      | ESN application                           | Workflow improvement: door-in-door-out time; 56 ± 34 min vs. 96 ± 45 min, door-to-groin puncture time; 50 ± 7 min vs. 120 ± 25 min, door-to-needle time; 55 ± 12 min vs. 78 ± 16 min ( $p < 0.0001$ ) | [37]       |
| Hospital                                                        |         |                                           |                                           |                                                                                                                                                                                                       |            |
| Patient registration                                            |         |                                           |                                           |                                                                                                                                                                                                       |            |
|                                                                 |         | Patient's ID information application      |                                           | Reduction of wrong patient registration in hospital from 0.68% to 0.12% ( $p < 0.001$ )                                                                                                               | [45]       |
| Brain imaging                                                   |         |                                           |                                           |                                                                                                                                                                                                       |            |
|                                                                 |         | Time measurement application              | Stroke Clock app.                         | Treatment decision time reduction (from 26.00 min to 16.73 min)                                                                                                                                       | [39]       |
|                                                                 |         | One-stop management                       | Flat panel CT performed in operation room | Faster treatment initiation                                                                                                                                                                           | [40,41]    |
|                                                                 |         | CBCT                                      |                                           | Posterior fossa artefacts reduction                                                                                                                                                                   | [42]       |
|                                                                 |         | AI                                        | AI in CT scanner                          | Radiation dose reduction                                                                                                                                                                              | [43]       |
|                                                                 |         | AI                                        | AI in MR scanner                          | 40–60% faster scanning                                                                                                                                                                                | [43]       |
|                                                                 |         | AI                                        | AI in scanner                             | Faster patient                                                                                                                                                                                        | [47]       |

|                                                                                                                                |                                                                     |                                                                                                                                        |          |
|--------------------------------------------------------------------------------------------------------------------------------|---------------------------------------------------------------------|----------------------------------------------------------------------------------------------------------------------------------------|----------|
|                                                                                                                                |                                                                     | positioning /<br>examination<br>planning                                                                                               |          |
| AI                                                                                                                             | AI in scanner                                                       | Contrast material<br>doses reduction                                                                                                   | [47]     |
| ASPECT                                                                                                                         |                                                                     |                                                                                                                                        |          |
| AI                                                                                                                             |                                                                     | AI non-inferiority<br>compared to<br>neuroradiologists ( $p < 0.003$ )                                                                 | [53]     |
| AI                                                                                                                             |                                                                     | Greater detection<br>sensitivity with<br>convolutional neural<br>networks algorithms<br>versus random forest<br>learning (85% vs. 68%) | [55]     |
| Artery occlusion detection                                                                                                     |                                                                     |                                                                                                                                        |          |
| AI                                                                                                                             | AI-occlusion detection<br>on NCCT                                   | Maximum sensitivity<br>of 97.5%                                                                                                        | [56]     |
| AI                                                                                                                             | AI-occlusion detection<br>on CTA                                    | Sensitivity of 82%                                                                                                                     | [57]     |
| Collateral score                                                                                                               |                                                                     |                                                                                                                                        |          |
| AI                                                                                                                             | Collateral score<br>calculated from CTA                             | Sensitivity for<br>identifying favorable<br>collateral flow<br>(collateral score 2-3)<br>were 0.99                                     | [61]     |
| Perfusion maps                                                                                                                 |                                                                     |                                                                                                                                        |          |
| AI                                                                                                                             | Neural network-<br>derived perfusion<br>maps                        | Similar performance<br>to standard methods,<br>but faster<br>computation time                                                          | [72]     |
| Differential diagnosis                                                                                                         |                                                                     |                                                                                                                                        |          |
| AI                                                                                                                             | Detection of<br>intracranial<br>hemorrhage on NCCT                  | Sensitivity 92-98%                                                                                                                     | [73]     |
| AI-convolutional and<br>recurrent neural<br>networks                                                                           | Detection of<br>intracranial<br>hemorrhage on NCCT                  | Sensitivity 98% -<br>superior results to the<br>junior radiology<br>trainees                                                           | [74]     |
| Prognosis                                                                                                                      |                                                                     |                                                                                                                                        |          |
| AI-convolutional and<br>recurrent neural<br>networks                                                                           | Final infarct prediction<br>form baseline MR<br>images              | AUC > 0.87                                                                                                                             | [81–82]  |
| AI                                                                                                                             | Unfavorable outcome<br>prediction                                   | Interclass correlation<br>score > 0.72                                                                                                 | [84]     |
| AI                                                                                                                             | Hemorrhagic<br>transformation<br>severity prediction<br>form MR PWI | Best accuracy 83.7%                                                                                                                    | [85]     |
| Techniques of the treatment                                                                                                    |                                                                     |                                                                                                                                        |          |
| First pass effect                                                                                                              |                                                                     |                                                                                                                                        |          |
| Balloon guide<br>catheter, BADDASS<br>approach, longer<br>stent retrievers,<br>correct positioning of<br>stent retrievers, the |                                                                     | Faster recanalization                                                                                                                  | [98–112] |

push and fluff  
technique, novel clot  
extractor, Solumbra  
technique, ARTS,  
CAPTIVE, SAVE,  
Protect plus.

#### Neurointerventional robotics

Robot-assisted  
neurointervention

Tele-robotic-assisted  
intervention

[8,9,133]

#### Intensive care, rehabilitation and medical control

##### Intensive care monitoring

AI

Prediction of cardiac  
arrest or acute  
respiratory failure

Improved prediction:  
40%

[134]

#### Hospital / Home

##### Rehabilitation

Robots

Motor function  
improvement of  
paralyzed extremity

[135,136]

AI

Sofia

Language  
conversation training

[138]

#### Home

##### Medical control

Mobile phone  
applications

WeChat

Increased medication  
compliance

[139]
